# Supplementary material for: Reentry and COVID-19: An Examination of the Vaccine Beliefs and Behaviors of Black Adults in an Urban Community
Source: Research Square preprint supplement (doi:10.21203/rs.3.rs-6597424/v1), 2025-06-13
Supplement: Supplementary file 1 [file c251911c4f0971ef66654b30.docx]

**Reentry and COVID-19 among Black Adults**

**Interview Protocol**

**Personal and Family Background**

1. Can you start sharing a little about yourself and how you became connected to the Re-Entry Program? (**background**, **reentry**)

**Incarceration and Reentry**

1. How did you first become incarcerated? (**incarceration**)
2. What was it like being incarcerated during the pandemic? (**incarceration**)
3. How has returning to your community been for you since being released? (**reentry**)

**COVID-19**

Now we are going to move into some questions about COVID-19.

1. Can you start by telling me what you know about COVID-19? (**knowledge**)
   - How did you learn this information?
2. Did you believe you would contract COVID-19? Why or why not? (**susceptibility**)
   - PROBE: *personal factors (race, age, gender, SES, sex, dis/ability, etc.), social-structural factors (family, racism, employment, poverty, etc.)*
3. On a scale of 1 to 5, with 1 being least serious and 5 being the most serious, how serious did you believe you would get *sick* from COVID-19 if you contracted it? Why? (**severity**)
   - PROBE: *personal factors (race, age, gender, SES, sex, dis/ability, etc.), social-structural factors (family, racism, employment, poverty, etc.)*
4. Using the same scale, how likely did you think you would *die* from COVID-19 if you contracted it? Why?
   - PROBE: *personal factors (race, age, gender, SES, sex, dis/ability, etc.), social-structural factors (family, racism, employment, poverty, etc.)*
5. What do you believe are the benefits of getting tested and vaccinated for COVID-19? Why? (**benefits**)
   - PROBE: *Clarify the positive effects of getting tested/vaccinated; do they see it helping reduce the risk of contracting COVID-19, getting sick, and dying, etc.*
6. What benefits do you see in NOT getting tested and vaccinated for COVID-19? Why? (**benefits**)
   - PROBE: *Clarify the positive effects of NOT getting tested/vaccinated (e.g., medical mistrust, religion/spiritual, etc.)*
7. What obstacles, if any, did you face when trying to test and/or get vaccinated for COVID-19? (**barriers**)
   - PROBE: *personal factors (race, age, gender, SES, sex, dis/ability, etc.), social-structural factors (family, racism, employment, poverty, etc.)*
8. What obstacles, if any, did you face that prevented you from testing or getting vaccinated for COVID-19?
   - PROBE: *personal factors (race, age, gender, SES, sex, dis/ability, etc.), social-structural factors (family, racism, employment, poverty, etc.)*
9. Were there any experiences before, during, or after your incarceration that made you believe you should or shouldn’t get tested/vaccinated for COVID-19? Why? (**cues to action**)
10. How confident are you that you would successfully get tested and vaccinated for COVID-19? Why? (**self-efficacy**)
11. How confident do you believe you would avoid contracting COVID-19 if not tested or vaccinated? Why? (**self-efficacy**)
12. In what ways, if at all, has COVID-19 affected your community reentry experience? (**reentry**)

**Closing**

1. In closing, when you hear the term “**successful reentry,**” what does this look like for you in your life?
2. How has the Re-Entry Program helped you to achieve a successful reentry? What about other reentry programs?
3. What impact has the Re-Entry Program had on you overall?
4. What else can reentry programs do to support you further?
5. Is there anything else that you would like to share about your experiences that I have not asked
